# Supplementary material
Source: Springer Nature journal article supplement (https://www.springermedizin.de/resource/supplementary/12884_2012_633_MOESM1_ESM.pdf/9457850)

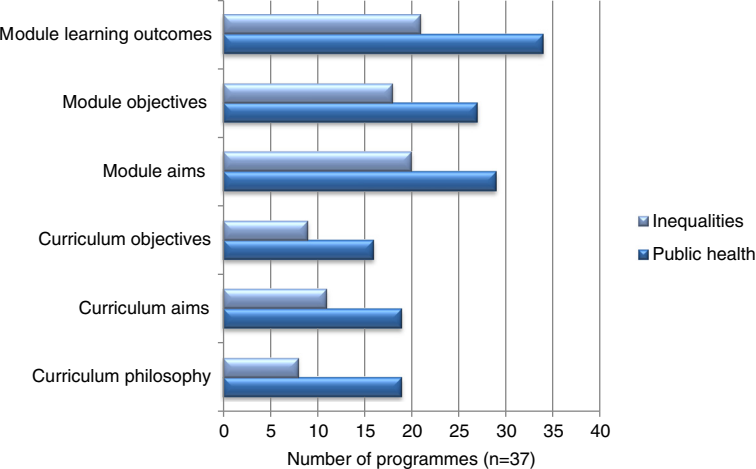

Supplement: MOESM1 [file 9457850]
